# 1 **Social-vocal brain networks in a non-human primate**

2 Daniel Y Takahashi <sup>1,4,†</sup>, Ahmed El Hady <sup>1,5,6,†</sup>, Yisi S Zhang <sup>1</sup>, Diana A Liao <sup>1</sup>, Gabriel Montaldo <sup>7,8,9,10</sup>,  
3 Alan Urban <sup>7,8,9,10</sup>, Asif A Ghazanfar <sup>1,2,3</sup>

4

5 <sup>1</sup>Princeton Neuroscience Institute, Princeton University; Princeton, USA

6 <sup>2</sup>Department of Psychology, Princeton University; Princeton, USA

7 <sup>3</sup>Department of Ecology and Evolutionary Biology, Princeton University; Princeton, USA

8 <sup>4</sup>Brain Institute, Federal University of Rio Grande do Norte; Natal, Brazil

9 <sup>5</sup>Department of Collective Behavior, Max Planck Institute of Animal Behavior; Konstanz, Germany

10 <sup>6</sup>Center for Advanced Study of Collective Behavior, University of Konstanz; Konstanz, Germany

11 <sup>7</sup>euro-Electronics Research Flanders; Leuven, Belgium

12 <sup>8</sup>VIB; Leuven, Belgium

13 <sup>9</sup>Imec; Leuven, Belgium

14 <sup>10</sup>Department of Neuroscience, Faculty of Medicine, KU Leuven; Leuven, Belgium

15

16

17

18 ‡, § Present address

19 † These authors contributed equally to this work

20

21

22

23

24

1 **Abstract**

2 During social interactions, individuals influence each other to coordinate their actions. Vocal  
3 communication is an exceptionally efficient way to exert such influence. Where and how social  
4 interactions are dynamically modulated in the brain is unknown. We used functional ultrasound  
5 imaging in marmoset monkeys – a highly vocal species - to investigate the dynamics of medial social  
6 brain areas in vocal perception, production, and audio-vocal interaction. We found that the activity of  
7 a distributed network of subcortical and cortical regions distinguishes calls associated with different  
8 social contexts. This same brain network showed different dynamics during externally and internally  
9 driven vocalizations. These findings suggest the existence of a social-vocal brain network in medial  
10 cortical and subcortical areas that is fundamental in social communication.

11

12

13 **One Sentence Summary**

14 A network of medial subcortical and cortical brain areas gate social communication in primates.

15

16

17

18

19

1 Vocal behavior is special relative to other forms of communication in that it can be used to rapidly  
2 influence the behavior of others at a distance or even out-of-sight from other group members. In  
3 some cases, it strengthens social bonds by maintaining contact (1, 2); in other cases, it warns of  
4 danger (whether intentionally or not) (3). Variations embedded in the acoustics of vocalizations  
5 allow listeners to distinguish between different types of utterances (e.g., contact or alarm  
6 vocalizations) and indexical cues (e.g., identity, body size and/or age) (4). These acoustic cues help  
7 listening individuals make decisions; for example, whether or not to reply with a vocalization, to  
8 keep silent, to move towards the source or away.

9  
10 Naturally, investigations into the mechanisms of vocal behavior focus largely on how, in a  
11 listener's brain, signals from the ear are processed by specialized circuits in the auditory system (5, 6),  
12 sent via direct connections to the frontal cortex (7, 8) whereby their activities modulate behaviors (9-  
13 11). However, in parallel to this cortical transformation of auditory signal to motor act in vocal  
14 communication are subcortical neural processes that are largely unknown and likely shared among  
15 many types of adaptive behaviors regardless of modality. Across all vertebrates, a group of six highly  
16 conserved midbrain and brainstem areas is critical to produce different social behaviors (e.g., mating,  
17 aggression, parental care). Dubbed the “social behavioral network” (SBN) it consists of the anterior  
18 hypothalamus (AH), pre-optic area (POA), ventromedial hypothalamus (VMH), lateral septum (LS),  
19 periaqueductal gray (PAG), and extended amygdala (ExtAm) (12-14) (fig. S1A). The SBN is thought  
20 to functionally assemble in different ways to produce different adaptive social behaviors. Although  
21 this parallel has not been made explicitly in the literature, much of the SBN overlaps with subcortical  
22 regions involved in primate vocal production (15, 16). Given their dense connectivity with frontal  
23 cortical regions (17), understanding how the SBN interacts with frontal cortical areas is a necessary  
24 step to understanding the evolution of the primate social communication (17, 18).

25  
26 We used functional ultrasound imaging (fUS) in the brains of marmoset monkeys to  
27 investigate the role(s) of the SBN in vocal perception, production, and audio-vocal interaction. In  
28 addition, we related SBN activity to a key frontal cortical region involved in vocal production: the  
29 anterior cingulate cortex (ACC) (fig. S1A) (19). Our goal was to determine how the SBN is involved  
30 in vocal communication and how networks were dynamically and differentially assembled as a  
31 function of different call types during vocal perception and production. Marmoset monkeys are  
32 particularly suitable for this investigation because they are highly social species, producing a rich  
33 repertoire of vocalizations whose production is a function of social context (20, 21). We used fUS--  
34 which measures changes in cerebral blood volume (a proxy for neural activity; (22, 23))--because it  
35 allowed for a wide coverage (16x20mm<sup>2</sup>) of the medial brain region, capturing activity in most of the  
36 SBN and medial frontal cortical areas at high spatial resolution (~125x200x400 μm<sup>3</sup>) and with a  
37 temporal resolution fast enough (2 Hz) to image brain dynamics in vocalizing and alert marmosets  
38 (fig. S1B).

39  
40 Studies investigating the auditory responses to vocalizations in regions associated with  
41 mammalian vocal production are few though songbird neurobiology suggests that certain specialized

1 brain regions may have auditory-vocalization function, e.g., HVC (24). Hence, we first asked: Do the  
2 SBN and ACC respond auditorily to vocalizations? Using a block design, we played back five  
3 different vocalizations and one amplitude-modulated noise signal to marmosets ( $n=5$ ) while imaging  
4 their midline brain regions. Two vocalizations were long-distance contact calls (phee and twitter),  
5 two were short-distance contact calls (trillphee and trill), and one was an alarm call (25); the noise  
6 signal was white noise amplitude-modulated to match phee calls (Fig. 1A). Each call block lasted for  
7 18 s with 25 to 50 s intervals between the blocks (Fig. 1B). The total amount of acoustic energy was  
8 matched between blocks. To localize specific brain areas, we registered the fUS images to a  
9 marmoset brain atlas (Fig. 1C). Figure 1D shows an example of fUS signal acquired from ACC  
10 during a single session for one marmoset. Figure 1E shows some examples of average CBV  
11 responses to vocalizations, with large responses after the call block onset (red lines indicate  
12 significant activity compared to the CBV activity before the playback onset). We plotted the areas in  
13 which the peak activity was significantly different from the baseline ( $p < 0.05$ , Bonferroni corrected)  
14 (Fig. 1F): large portions of subcortical areas and the medial prefrontal cortex were significantly  
15 activated. The ACC and regions within the SBN exhibited the strongest brain responses to  
16 vocalizations. Limbic thalamus (LT) (see Fig S1A) also showed a significant response consistent with  
17 its role in connecting SBN and ACC (26).

18  
19 Figure 1E shows that some areas exhibit sustained activity (e.g., ACC), other areas have  
20 short-lived activities (e.g., anterior hypothalamus), and still others have decreased responses (e.g.,  
21 SMA). Sustained brain activation are thought to modulate behavior even after the stimulus is no  
22 longer present, whereas short-lived activations are thought to be related to perceptual processes (27).  
23 Additionally, areas with decreased brain activity shows that these areas are deactivated, possibly  
24 gating sensory-motor information during acoustic perception (28). Several SBN areas (e.g., LS,  
25 POA) and ACC showed longer sustained activity (Fig. 1G). Medial sensorimotor cortex (mSMC)  
26 had significant CBV decrease in response to the playback, especially in the supplementary motor  
27 area (SMA) and pre-supplementary motor area (pre-SMA) (Fig. 1H-I). These areas exhibited CBV  
28 dynamics that were negatively correlated with the SBN and ACC activity (fig. S2). These findings  
29 indicate that SBN and ACC process sensory information and mSMC suppresses motor activity  
30 during vocal perception.

Figure 1

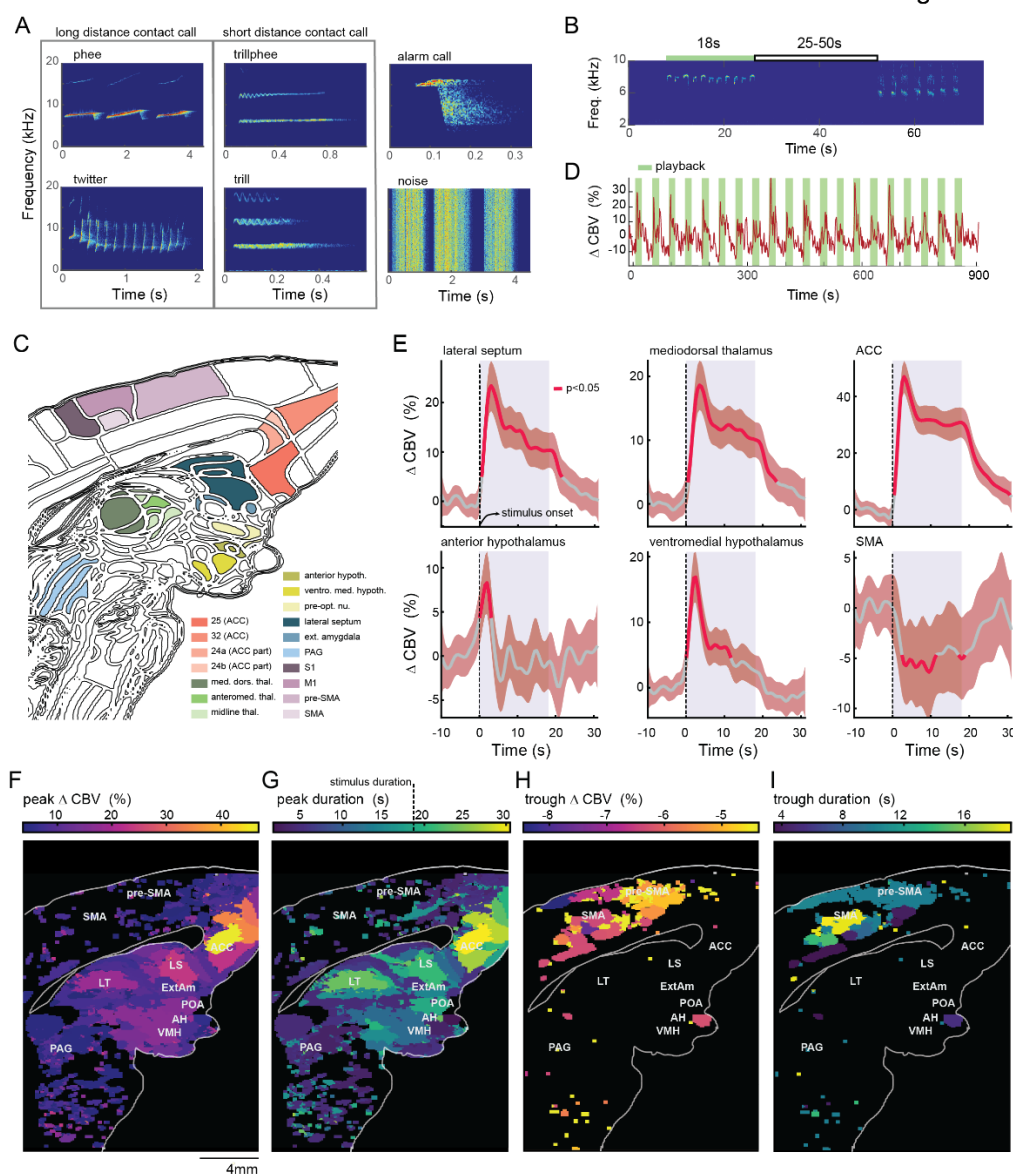

1  
 2 **Fig. 1: Brain dynamics during vocal perception:** (A) Spectrogram of the different call types used in  
 3 playback. (B) Spectrogram of two example block stimuli. (C) Annotated atlas registered to a reference fUS.  
 4 (D) An example of the CBV response duration in the ACC. Green stripes represent the time during which the stimuli  
 5 were played. X-axis: percentage change of CBV. (E) Example brain regions that showed significant response  
 6 while the marmoset was listening to the playbacks (dotted line and shaded blue area represent the onset and  
 7 duration of the stimulus, respectively). Solid red lines indicate CBV activity that was significantly different ( $p <$   
 8  $0.05$  Bonferroni corrected) from the baseline activity (-10 to 0.5 s before the stimulus onset). Shaded red  
 9 indicates 95% confidence interval. The CBV response had peaks and troughs. (F) Activity map of medial brain  
 10 regions showing areas that had the significant maximum peak in CBV in response to playback ( $p < 0.05$  FDR  
 11 corrected). Colorbar indicates the percentage difference between baseline and peak response. (G) Duration  
 12 map of medial brain regions showing the duration of the brain response. Colorbar indicates the duration of the  
 13 significant peaks in (F). The dotted line in the colorbar indicates the stimulus duration (18 s). (H) Activity map

1 of medial brain regions showing areas that had significant trough (largest decrease) in CBV in response to  
2 playback stimuli ( $p < 0.05$  FDR corrected). **(I)** Duration map of medial brain regions showing the duration of  
3 the brain response (significant CBV troughs).

4

5 A key prediction of SBN activity is that the network should respond differently in distinct  
6 social contexts (12, 14). We could test this prediction by comparing the brain response to different  
7 call types. If brain activity is related to the context in which each calls are produced, we expected that  
8 long-distance contact calls (phee and twitter calls) would exhibit similar CBV responses that are  
9 different from the responses to both short-distance contact calls (trillphee and trill calls) and alarm  
10 calls. Conversely, if the brain responses are related straightforwardly to simpler acoustic characteristics  
11 of the calls (like a primary auditory region), we expected that the response to phee calls and trillphees  
12 should be more similar compared to other calls, because their acoustic characteristics are more similar  
13 (fig. S3A-B). We also used responses to the amplitude-modulated white noise as a control for phee  
14 calls (same duration and amplitude modulation, but different frequency content) to verify that  
15 amplitude modulation and call duration are not the principal factors for the brain response.

16 Figure 2A shows that CBV response to phee and twitter are statistically indistinguishable for  
17 all medial brain areas ( $p > 0.05$  FDR corrected). In contrast, responses to trillphee, trill, and alarm  
18 calls exhibit significant differences from the phee, especially in the SBN and ACC (Fig. 2B-D,  $p < 0.05$   
19 FDR corrected, fig. S4). Amplitude and duration-matched noise stimuli showed the largest differences  
20 among stimuli, having no natural communicative content (Figs. 2E,  $p < 0.05$  FDR corrected). To  
21 further quantify the degree of similarity between brain responses to different types of calls, we  
22 calculated the hierarchical clustering of CBV activity across the entire medial brain region. If the medial  
23 brain regions integrate the social context associated with vocalizations, we expected that responses to  
24 long-distance contact calls would be grouped together. In contrast, responses for short-distance  
25 contact calls should be grouped in a different cluster, as was indeed the case (Fig. 2F).

## Figure 2

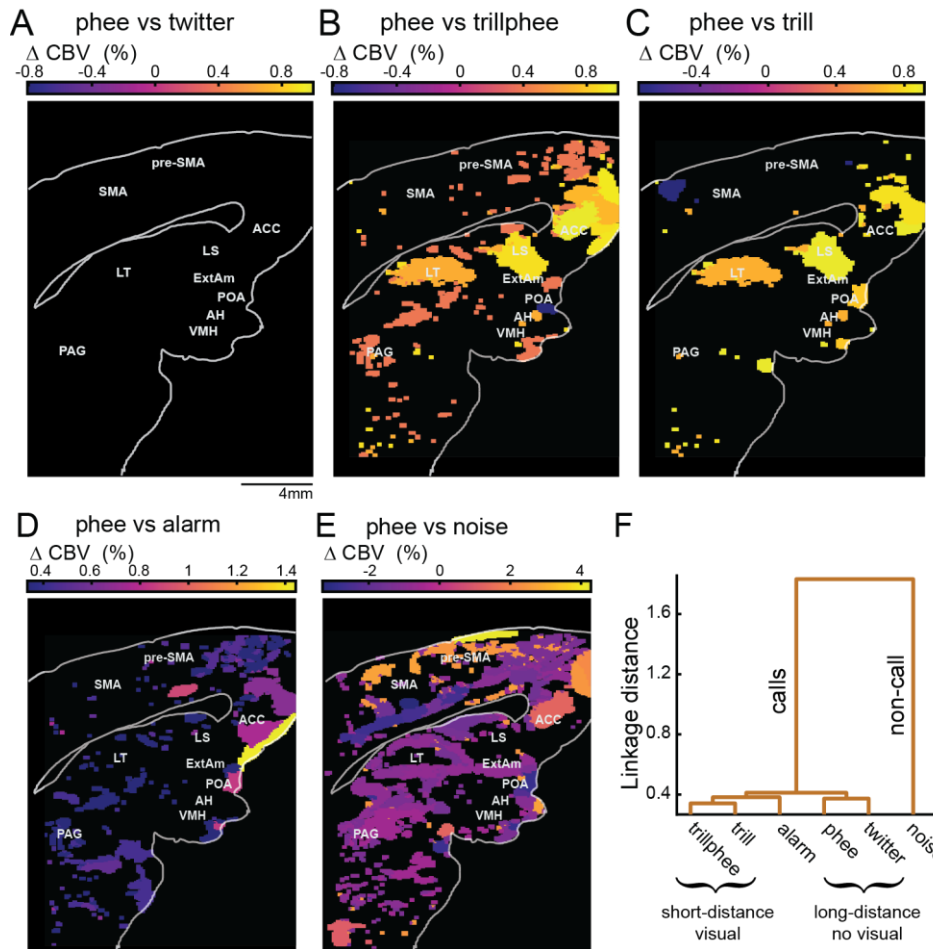

1

8

9

10 Given that vocal communication is a sensory-motor interaction (29), to fully understand the  
 11 role of SBN during vocal communication we also need to study its dynamics during vocal production.  
 12 Many physiological and lesion studies have implicated parts of the SBN and medial frontal cortex as  
 13 important for vocal production (30-32). However, how those different areas interact during vocal  
 14 production -- perhaps differentially assembling for different vocalizations -- is unknown. We used fUS  
 15 to image CBV changes in the medial brain region in marmosets while they produced different  
 vocalizations (phees, trills and alarm calls; n=3 of the 5 subjects used for the perception experiment).

1           Figure 3A shows an example of a single contact call production and the corresponding CBV  
2 change in ACC. More generally, the average dynamics of medial brain activity during vocal production  
3 varies a lot among areas (Fig. 3B). To better understand these dynamics, we plotted the significant  
4 largest peak CBV activities ( $p < 0.05$ , Bonferroni corrected, Fig. 3C). Large parts of the medial region  
5 showed significant activation during vocal production. Brain areas related to vocal initiation exhibit  
6 the strongest increase in CBV activity before the onset of spontaneous vocal production (defined  
7 behaviorally as a vocalization produced following at least a 12s period of no vocal production from  
8 the subject or a nearby conspecific (29)). On the other hand, areas related to sensory-motor  
9 modulation of ongoing vocalization have the largest peak activity during the spontaneous vocalization.  
10 By calculating the timing of the largest CBV peak with respect to the onset, SBN areas showed  
11 activation before the onset, whereas mSMC showed a CBV peak immediately after the onset (Fig.  
12 3D). The ACC showed a delayed CBV response compared to the rest of the medial brain regions,  
13 indicating a different role during vocal production (Figs. 3B,D). These findings suggests that (1) SBN  
14 areas are related to preparation and initiation of spontaneous vocalization, (2) mSMC is related to  
15 sensory-motor modulation of ongoing vocalization, (3) ACC is perhaps involved in monitoring the  
16 outcome of vocalization(33).

17           Areas that exhibit an increase in CBV activity can also show a decrease in CBV activity at  
18 different time points relative to the call onset (Figure 3B). A natural question is how the increase and  
19 decrease in CBV activities are coordinated among different brain areas. One possibility is that SBN  
20 and ACC show CBV dynamics that alternates with the dynamics of mSMC, similar to the CBV  
21 dynamics during vocal perception. To test this hypothesis, we plotted the areas with activity troughs  
22 significantly different from the baseline ( $p < 0.05$ , Bonferroni corrected, Fig. 3E). Again, the SBN,  
23 ACC, and mSMC showed significant suppression. When we computed the timing of the suppression  
24 with respect to the onset of calls, mSMC showed it before the onset of call and, in general, SBN and  
25 ACC exhibit suppression after the call onset (Fig. 3F). This suggests a negative correlation between  
26 SBN+ACC and mSMC activity. We confirmed this by calculating the correlation matrix between SBN,  
27 ACC and medial cortical motor areas (Fig. 3G, fig. S5). The only exception was PAG which was  
28 correlated positively with cortical motor areas and negatively with SBN, consistent with its role as a  
29 motor area during vocalization (31).



Figure 3

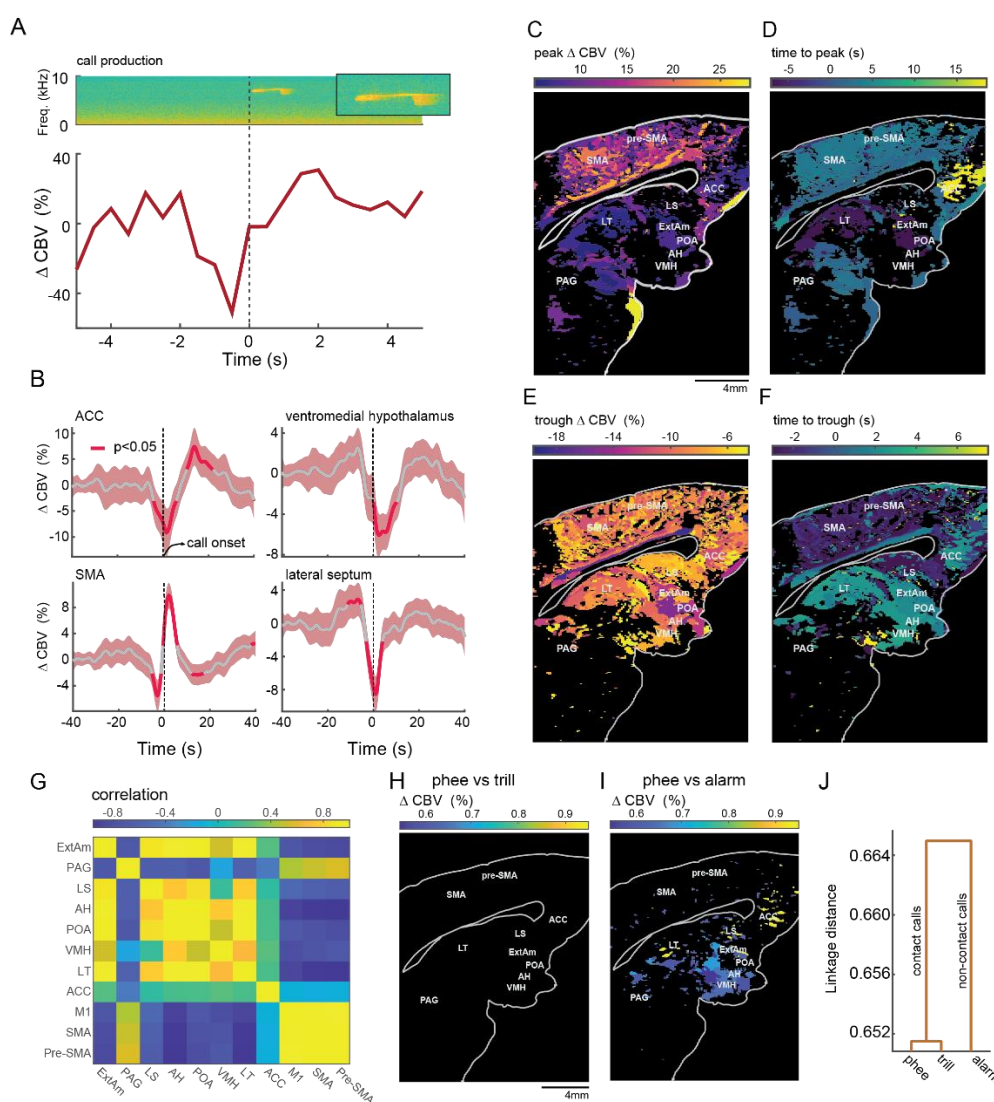

1  
 2 **Fig. 3: Medial brain regions activity during vocal production.** (A) Example of CBV activity during a  
 3 single contact-call production in ACC. Top: spectrogram of the call. Bottom: corresponding CBV. (B) A  
 4 subset of brain areas shows changes in the CBV during vocalization. Average CBV activity for all call types.  
 5 Solid red lines indicate CBV activity that was significantly different ( $p < 0.05$  Bonferroni corrected) from the  
 6 baseline activity (-40 to -30 s before the call onset). Shaded red indicates 95% confidence interval. (C)  
 7 Activity map showing the brain regions that have significant peak in the CBV ( $p < 0.05$  Bonferroni  
 8 corrected). Colorbar shows the difference between baseline and peak. (D) Delay map showing the brain  
 9 regions and the time to peak in the areas shown in (C). Colorbar shows the delay to the maximum peak. (E)  
 10 Activity map showing brain regions that have significant decrease in the CBV ( $p < 0.05$  Bonferroni  
 11 corrected). (F) Delay map showing the time to the trough of the CBV of the areas in (E). Colorbar shows the  
 12 delay to the lowest trough. (G) Correlation between SBN, ACC, SMA, pre-SMA, and, M1 activity. (H) and  
 13 (I) Maps showing medial brain areas that have significant differences ( $p < 0.05$  FDR corrected) in the CBV  
 14 activity between **phee** and trill calls production and phee and alarm calls production, respectively. Colobar  
 15 shows the difference between CBV activity during phee and the respective calls. (J) Hierarchical clustering of

1 all brain activities in response to phee, trill, and alarm calls showing clusters of contact calls versus non-  
2 contact calls.

3 Next, we wanted to know whether the SBN and ACC differentiated between different  
4 spontaneously produced vocalizations. If SBN and ACC activity is related to social context in which  
5 calls are produced, we predict that the SBN and ACC activity for vocal production is similar between  
6 contact call types (phees and trills) versus alarm calls. In support of this, a comparison of CBV  
7 response trajectories between contact calls (phees versus trills) did not exhibit a significant difference  
8 (Fig. 3H), but phee versus alarm call production showed significant differences in SBN and ACC  
9 regions (Fig. 3I). Moreover, when hierarchically clustered, brain activities during contact calls  
10 production were grouped together whereas brain activities for alarm calls were clustered separately  
11 supporting the notion that the medial brain regions are social context-sensitive (Fig. 3J).

12 A social context is not defined only by the usage of different types of calls, but also by the  
13 history of vocal interaction. A spontaneous vocalization can be distinguished from a vocalization  
14 produced in response to another's vocalization (externally-driven; e.g., vocal turn-taking; (29, 34) or  
15 one that was immediately preceded by the vocalization from the same individual (internally-driven;  
16 e.g., a vocal sequence (29)). If the medial brain processes social context encompassing both past vocal  
17 history and vocalization types, we predicted that there would be a difference in the brain dynamics  
18 during vocal production depending on whether a call is spontaneous, in response to a conspecific's  
19 call or preceded by a vocalization from the same individual. We also hypothesized that the effect of  
20 call history dependence would be more salient for contact phees and trills, which are often produced  
21 during vocal interaction (20), than for alarm calls. Figure 4A shows that regions of the SBN and ACC  
22 areas are more activated when produced in response than when produced spontaneously ( $p < 0.05$   
23 FDR corrected). This result is consistent with the hypothesis that SBN+ACC network functions to  
24 process externally-driven social contexts adaptively. Figure 4B shows that the mSMC is more strongly  
25 activated during sequences of calls when compared to spontaneous calls ( $p < 0.05$ , FDR corrected),  
26 indicating that mSMC is related to internally driven vocalizations. We observed significantly less areas  
27 with history dependence for alarm calls (figs. S6A-B).

28

## Figure 4

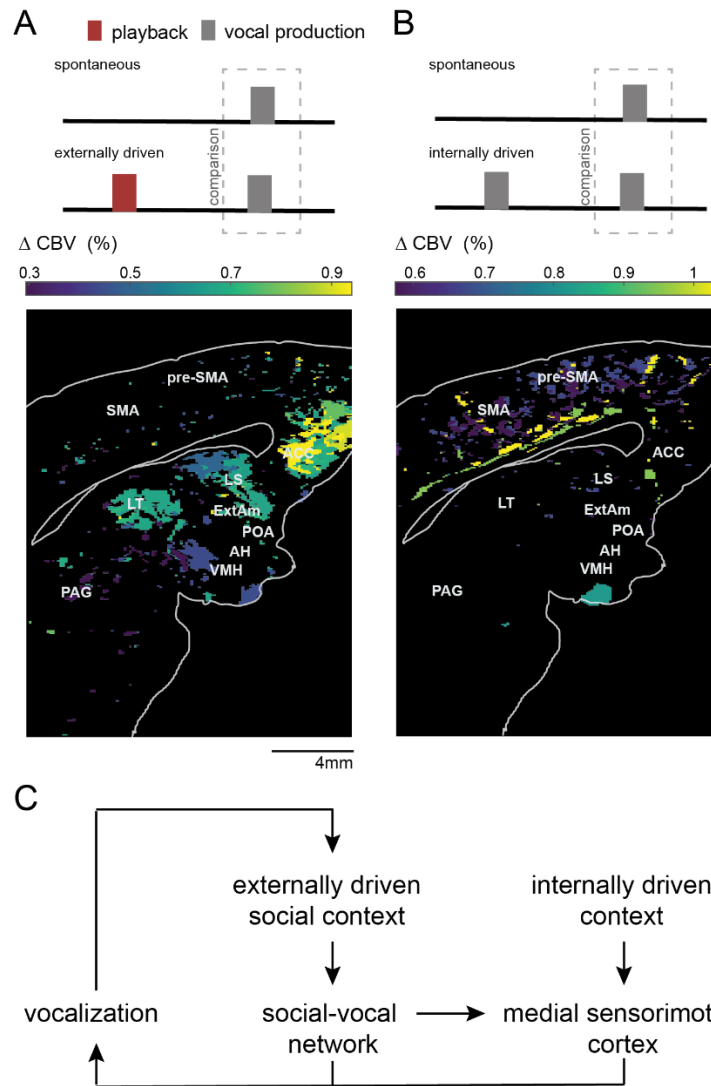

1

2 **Figure 4: History dependence in the medial brain regions during audio-vocal interaction. (A)** CBV  
 3 activity differences between spontaneous and response contact calls. The brain map shows significantly  
 4 different areas between both conditions ( $p < 0.05$  FDR corrected). Colorbar shows the percentage difference  
 5 between the CBV activity during production of (externally driven) response and spontaneous contact calls.  
 6 Positive values indicate that the activity was stronger for the response to playback calls. **(B)** CBV activity  
 7 difference between spontaneous and sequence contact calls. The brain map shows significantly different areas  
 8 between both conditions ( $p < 0.05$  FDR corrected). Colorbar shows the percentage difference between the  
 9 CBV activity during (internally driven) sequence and spontaneous call production. Positive values indicate  
 10 that the activity was stronger for sequence contact calls. **(C)** Proposed model of the effect of externally driven  
 11 social context on social-vocal network (SBN, ACC, LT) and of internally driven context on mSMC.  
 12

13 During a conversation, an individual initially produces vocalizations adapted for the social  
 14 context. Then another individual listens to the vocalizations until it finishes before responding. While

1 listening, the same individual integrates the social contexts to produce the response that can be a single  
2 or a sequence of vocalizations depending on the internal state. The repetition of this cycle creates  
3 complexity in the vocal communication going beyond what can be accomplished with an isolated  
4 utterance (35). Our results suggest a neural mechanism for such a communicative cycle (Fig. 4C).  
5 During vocal perception, SBN and ACC encode social context. At the same time, mSMC is suppressed  
6 so that other sensory-motor activities like body movements are avoided, making the marmoset listen  
7 to the calls. Once the subject listened to the calls, SBN and ACC activities will influence the response  
8 call production. To produce a call sequence, the mSMC is activated, similar to the execution of other  
9 sequential behaviors (36).

10 Previous studies have shown that SBN is a key area modulating social behaviors in fishes and  
11 tetrapods (12, 14). Interestingly, in primates, including humans, most research on the social brain  
12 concentrated on the role of cortex in the social cognition, partly due to methodological choices and  
13 partly due to the salience of the cortex in primates (17, 37, 38). Consequently, there is a lack of studies  
14 of SBN in primates during social cognition, despite the hypothesis that it should be universally relevant  
15 for social behavior in tetrapods. On the other hand, when SBN areas are studied in primates, they are  
16 often associated with “simpler” roles like initiation or production of species-typical behaviors (as  
17 pointed out by (17, 39)). For instance, in vocal communication, brain areas that constitute SBN are  
18 considered part of primary vocal motor network related to the initiation and production of  
19 “emotional” vocalizations, contrasting with lateral frontal cortical areas which are associated with  
20 cognitive control of vocalization (15, 40). Naturally, this led to the hypothesis that the evolutionary  
21 change in primate social communication (especially in humans) is driven mainly by cortical areas (41).  
22 We show that SBN in marmoset monkeys has a role beyond simple production of vocalizations, being  
23 related to social perception, vocal modulation, and historicity in vocal communication, all of which  
24 generate flexibility in social interactions. This conclusion is also bolstered by the fact that  
25 communication in non-mammalian “cortex-less” vertebrates also show a degree of sophistication not  
26 expected (42). Together, these results support the hypothesis that the tinkering of SBN and its  
27 connections with frontal cortical areas like ACC were a key step in the evolution of primate  
28 communication, including human speech (18).

29

30

31

32

33

34

35

## 1   References

- 2
- 3   1.    R. Dunbar, Psychology. Evolution of the social brain. *Science* **302**, 1160-1161 (2003).
- 4   2.    I. G. Kulahci, A. A. Ghazanfar, D. I. Rubenstein, Knowledgeable Lemurs Become More Central in
- 5        Social Networks. *Curr Biol* **28**, 1306-1310 e1302 (2018).
- 6   3.    R. M. Seyfarth, D. L. Cheney, P. Marler, Monkey responses to three different alarm calls: evidence of
- 7        predator classification and semantic communication. *Science* **210**, 801-803 (1980).
- 8   4.    C. Fichtel, M. Manser, in *Animal behaviour: Evolution and mechanisms*. (Springer, 2010), pp. 29-54.
- 9   5.    C. Perrodin, C. Kayser, N. K. Logothetis, C. I. Petkov, Voice cells in the primate temporal lobe. *Curr*
- 10        *Biol* **21**, 1408-1415 (2011).
- 11   6.    C. I. Petkov *et al.*, A voice region in the monkey brain. *Nature neuroscience* **11**, 367-374 (2008).
- 12   7.    J. K. Rilling *et al.*, The neural correlates of the affective response to unreciprocated cooperation.
- 13        *Neuropsychologia* **46**, 1256-1266 (2008).
- 14   8.    F. Balezeau *et al.*, Primate auditory prototype in the evolution of the arcuate fasciculus. *Nat Neurosci* **23**,
- 15        611-614 (2020).
- 16   9.    B. Plakke, J. Hwang, L. M. Romanski, Inactivation of Primate Prefrontal Cortex Impairs Auditory and
- 17        Audiovisual Working Memory. *J Neurosci* **35**, 9666-9675 (2015).
- 18   10.   S. R. Hage, A. Nieder, Audio-vocal interaction in single neurons of the monkey ventrolateral prefrontal
- 19        cortex. *J Neurosci* **35**, 7030-7040 (2015).
- 20   11.   D. E. Okobi, Jr., A. Banerjee, A. M. M. Matheson, S. M. Phelps, M. A. Long, Motor cortical control
- 21        of vocal interaction in neotropical singing mice. *Science* **363**, 983-988 (2019).
- 22   12.   J. L. Goodson, The vertebrate social behavior network: evolutionary themes and variations. *Horm Behav*
- 23        **48**, 11-22 (2005).
- 24   13.   L. A. O'Connell, H. A. Hofmann, Evolution of a vertebrate social decision-making network. *Science*
- 25        **336**, 1154-1157 (2012).
- 26   14.   S. W. Newman, The medial extended amygdala in male reproductive behavior. A node in the
- 27        mammalian social behavior network. *Ann N Y Acad Sci* **877**, 242-257 (1999).
- 28   15.   G. Holstege, H. H. Subramanian, Two different motor systems are needed to generate human speech.
- 29        *J Comp Neurol* **524**, 1558-1577 (2016).
- 30   16.   U. Jurgens, K. Richter, Glutamate-induced vocalization in the squirrel monkey. *Brain Res* **373**, 349-358
- 31        (1986).
- 32   17.   G. S. Prounis, A. G. Ophir, One cranium, two brains not yet introduced: Distinct but complementary
- 33        views of the social brain. *Neurosci Biobehav Rev* **108**, 231-245 (2020).
- 34   18.   S. Syal, B. L. Finlay, Thinking outside the cortex: social motivation in the evolution and development
- 35        of language. *Dev Sci* **14**, 417-430 (2011).
- 36   19.   U. Jurgens, The neural control of vocalization in mammals: a review. *J Voice* **23**, 1-10 (2009).
- 37   20.   D. A. Liao, Y. S. Zhang, L. X. Cai, A. A. Ghazanfar, Internal states and extrinsic factors both determine
- 38        monkey vocal production. *Proc Natl Acad Sci U S A* **115**, 3978-3983 (2018).
- 39   21.   B. M. Bezerra, A. Souto, Structure and usage of the vocal repertoire of *Callithrix jacchus*. *International*
- 40        *Journal of Primatology* **29**, 671 (2008).
- 41   22.   A. Urban *et al.*, Real-time imaging of brain activity in freely moving rats using functional ultrasound.
- 42        *Nat Methods* **12**, 873-878 (2015).
- 43   23.   E. Mace *et al.*, Whole-Brain Functional Ultrasound Imaging Reveals Brain Modules for Visuomotor
- 44        Integration. *Neuron* **100**, 1241-1251 e1247 (2018).
- 45   24.   L. C. Katz, M. E. Gurney, Auditory responses in the zebra finch's motor system for song. *Brain Res*
- 46        **221**, 192-197 (1981).
- 47   25.   G. Epple, Comparative studies on vocalization in marmoset monkeys (*Hapalidae*). *Folia Primatol (Basel)*
- 48        **8**, 1-40 (1968).
- 49   26.   R. P. Vertes, S. B. Linley, W. B. Hoover, Limbic circuitry of the midline thalamus. *Neurosci Biobehav Rev*
- 50        **54**, 89-107 (2015).

- 1 27. S. M. Courtney, L. G. Ungerleider, K. Keil, J. V. Haxby, Transient and sustained activity in a distributed  
2 neural system for human working memory. *Nature* **386**, 608-611 (1997).
- 3 28. A. Toth *et al.*, Neuronal coding of auditory sensorimotor gating in medial prefrontal cortex. *Behav Brain*  
4 *Res* **326**, 200-208 (2017).
- 5 29. D. Y. Takahashi, D. Z. Narayanan, A. A. Ghazanfar, Coupled oscillator dynamics of vocal turn-taking  
6 in monkeys. *Curr Biol* **23**, 2162-2168 (2013).
- 7 30. S. R. Hage, U. Jurgens, G. Ehret, Audio-vocal interaction in the pontine brainstem during self-initiated  
8 vocalization in the squirrel monkey. *Eur J Neurosci* **23**, 3297-3308 (2006).
- 9 31. U. Jurgens, R. Pratt, Role of the periaqueductal grey in vocal expression of emotion. *Brain Res* **167**, 367-  
10 378 (1979).
- 11 32. U. Jurgens, D. Ploog, Cerebral representation of vocalization in the squirrel monkey. *Exp Brain Res* **10**,  
12 532-554 (1970).
- 13 33. U. Livneh, J. Resnik, Y. Shohat, R. Paz, Self-monitoring of social facial expressions in the primate  
14 amygdala and cingulate cortex. *Proc Natl Acad Sci U S A* **109**, 18956-18961 (2012).
- 15 34. S. C. Levinson, Turn-taking in Human Communication--Origins and Implications for Language  
16 Processing. *Trends Cogn Sci* **20**, 6-14 (2016).
- 17 35. J. C. Flack, Animal communication: hidden complexity. *Curr Biol* **23**, R967-969 (2013).
- 18 36. J. Tanji, K. Shima, Role for supplementary motor area cells in planning several movements ahead.  
19 *Nature* **371**, 413-416 (1994).
- 20 37. J. Sliwa, W. A. Freiwald, A dedicated network for social interaction processing in the primate brain.  
21 *Science* **356**, 745-749 (2017).
- 22 38. S. V. Shepherd, W. A. Freiwald, Functional Networks for Social Communication in the Macaque  
23 Monkey. *Neuron* **99**, 413-420 e413 (2018).
- 24 39. J. E. Lischinsky, D. Lin, Neural mechanisms of aggression across species. *Nat Neurosci* **23**, 1317-1328  
25 (2020).
- 26 40. S. R. Hage, A. Nieder, Dual Neural Network Model for the Evolution of Speech and Language. *Trends*  
27 *Neurosci* **39**, 813-829 (2016).
- 28 41. L. Brothers, Brain mechanisms of social cognition. *J Psychopharmacol* **10**, 2-8 (1996).
- 29 42. C. A. Weitekamp, H. A. Hofmann, Evolutionary themes in the neurobiology of social cognition. *Curr*  
30 *Opin Neurobiol* **28**, 22-27 (2014).
- 31 43. E. Mace *et al.*, Functional ultrasound imaging of the brain. *Nat Methods* **8**, 662-664 (2011).
- 32 44. Y. Hirano *et al.*, Investigation of the BOLD and CBV fMRI responses to somatosensory stimulation  
33 in awake marmosets (*Callithrix jacchus*). *NMR Biomed* **31**, (2018).
- 34 45. D. Boido *et al.*, Mesoscopic and microscopic imaging of sensory responses in the same animal. *Nat*  
35 *Commun* **10**, 1110 (2019).
- 36 46. A. O. Nunez-Elizalde *et al.*, Neural basis of functional ultrasound signals. *bioRxiv*, (2021).
- 37 47. L. Freire, J. F. Mangin, Motion correction algorithms may create spurious brain activations in the  
38 absence of subject motion. *Neuroimage* **14**, 709-722 (2001).
- 39 48. S. Klein, M. Staring, K. Murphy, M. A. Viergever, J. P. Pluim, Elastix: a toolbox for intensity-based  
40 medical image registration. *IEEE transactions on medical imaging* **29**, 196-205 (2009).
- 41 49. A. Woodward *et al.*, The Brain/MINDS 3D digital marmoset brain atlas. *Sci Data* **5**, 180009 (2018).
- 42 50. C. D. Hardman, K. W. Ashwell, *Stereotaxic and chemoarchitectural atlas of the brain of the common marmoset*  
43 (*Callithrix jacchus*). (CRC press, 2012).
- 44
- 45
- 46
- 47
- 48
- 49

1 **Acknowledgments**

2 **Funding:** This work was supported by an NIH-NINDS grant to A.A.G. (R01NS054898).

3 **Author Contributions:**

4 Conceptualization: DYT, AEH, AAG

5 Experimental design: DYT, AEH, AAG

6 Funding acquisition: AAG

7 fUS probe design: GM, AU

8 Data collection: DYT, AEH, YSZ, DAL

9 Data analysis: DYT, AEH

10 Image registration: YSZ

11 Writing – original draft: DYT, AEH, AAG

12 Writing – review & editing: DYT, AEH, AAG

13 **Competing interests:** A.U. is the founder and a shareholder of AUTC company commercializing functional  
14 ultrasound imaging solutions for preclinical and clinical research.

15

16

1  
2  
3  
4  
5  
6  
7  
8  
9  
10  
11  
12  
13  
14  
15

## Supplementary Materials

### Material and Methods

#### Subjects

The subjects used in this study included five adult common marmosets (*Callithrix jacchus*) housed at Princeton University. The marmosets were three males and two females. Animals were fed once daily with standard commercial chow supplemented with fresh fruits and vegetables. The animals had ad libitum access to water. The colony room was maintained at a temperature of approximately 27C and 50%– 60% relative humidity, with a 12 hr light:12 hr dark cycle. Before experiments were conducted, all animals were familiarized with the testing room and imaging equipment. All experimental sessions were performed in compliance with the guidelines of the Princeton University Institutional Animal Care and Use Committee.

#### Surgery

Initial monitoring included temperature, pulse, respiration, and SPO<sub>2</sub>. Blood was collected for pre-operative glucose measurement. Dexamethasone 1 mg/kg IM and Baytril 5mg/kg IM were administered pre-operatively. The animal is induced with alfaxalone 10 mg/kg IM and intubated. The animal is carefully placed in a marmoset-specific stereotaxic device, and the exposed skin is prepared. All the following procedures were executed in sterile conditions. The skull overlying the brain region of interest was exposed by making an incision along the top of the head through the skin. The tissue was reflected, and the periosteum removed until the skull was exposed. Sterilized miniature titanium screws were inserted into the bone at various positions to serve as anchors to hold the head plate to the skull covering the exposed area's border. The head plate is a machined piece of flat metal with a rectangular hole in the center that allows the fUS probe to be attached and aligned during imaging experiments. The head plate is attached to the skull and screws with dental cement (C&B Metabond® Quick Adhesive Cement System, Parkell). A head post was fixed to secure the hardware. A cranial window of ~ 8 mm X 16 mm was created with a piezoelectric drill that does not damage soft tissues. To protect the craniotomy when the animal was not being imaged, the cranial window was sealed using silicone gel (Kwik-cast; World Precision Instruments). A stainless-steel cover was secured headplate to cover the headplate and headshield.

#### Functional ultrasound imaging (fUS)

To measure the hemodynamic change of the brain areas in alert and vocalizing marmosets, we used functional ultrasound imaging (fUS) (22, 42). The hemodynamic change measured by fUS strongly correlates with the cerebral volume change (CBV) change of the arterioles and capillaries. It compares more closely to CBV-fMRI signal than BOLD-fMRI (23). CBV signals show a shorter onset time and time-to-peak than BOLD signals in marmosets (43). fUS signals correlate linearly with neural activity for various physiological regimes (44, 45). We used a custom ultrasound linear probe with a minimal footprint (20mm by 8mm) and light enough (15 g) for the animal to carry. The probe comprises 128 elements of 125µm pitch working at a central frequency of 12MHz, allowing a wide area coverage (20mm depth, 16mm width). The probe was connected to an ultrasound scanner (Vantage 128, Verasonics) controlled by an HPC workstation equipped with 4 GPUs (AUTC, fUSI-2, Estonia). The functional ultrasound image formation sequence was adapted from (42). The main parameters of the sequence to obtain a single functional ultrasound imaging image were: 200



1 compound images acquired at 500 Hz, each compound image obtained with 9 plane waves ( $-6^\circ$  to  $6^\circ$   
2  $1.5^\circ$  steep). With these parameters, the fUS had a temporal resolution of 2Hz and a spatial resolution  
3 (point spread function) of  $125\mu\text{m}$  width,  $130\mu\text{m}$  depth, and 200 to  $800\mu\text{m}$  thickness depending on  
4 the depth ( $200\mu\text{m}$  at 12mm depth). We acquired fUS signal at the midline sagittal plane (0mm).

### 6 **Relation between fUS signal and cerebral blood volume**

7 The Doppler intensity is proportional to the part of the CBV signal corresponding to red blood cells  
8 moving faster than  $\sim 1$  mm/s in the z-direction ( $CBV_{filter}$ ):

$$9 \quad I(x, y, z, t) = a(x, y, z) \cdot CBV_{filter}(x, y, z, t).$$

11 The constant of proportionality is different for each voxel and depends on several parameters,  
12 including emitted power, tissue attenuation, the geometry of the probe, etc. To remove such constant,  
13 we defined the hemodynamic signal measured by fUS as  $\Delta CBV$  representing the variation of the  
14 Doppler intensity compared to the background signal:

$$15 \quad \Delta CBV(x, y, z, t) = \frac{I(x, y, z, t) - I_{background}(x, y, z)}{I_{background}(x, y, z)}.$$

17 The background signal was the low-frequency component ( $< 0.01\text{Hz}$ ) of the signal.

### 21 **Experimental protocol for fUS recording**

22 Each animal was tested only once per day at around the same time of the day each time. First, the  
23 experimenter transfers the marmoset from its housing to the experimental room. The experimental  
24 room measured  $3.2\text{m} \times 5.5\text{m}$  with walls covered in sound attenuating foam. A table ( $0.75$  m in height)  
25 was positioned at one of the corners of the room. The animal is put in a custom-designed partial  
26 restraint device, and the head is temporarily fixed using the head post. Afterward, all procedures were  
27 performed with sterile surgical gloves as well as autoclaved tools and materials. The head cover is then  
28 removed to expose the cranial window. The experimenter flushes the cranial window using sterile  
29 water and applies de-bubbled sterile ultrasound gel (Sterile Aquasonic 100 Ultrasound Gel) onto the  
30 recording surface. A custom-designed probe holder is fixed on top of the head plate. The ultrasound  
31 probe is then placed inside the probe holder. The experimenter releases the head post so that the  
32 animal has a wider range of movement. The experimenter took an initial functional ultrasound image  
33 to ensure no large movement artifacts and that selected the right plane. Marmosets were then recorded  
34 during the experiment for  $\sim 1$ hour. After the recording, the experimenter cleans the recording surface  
35 with chlorhexidine  $0.05\%$  and sterile water. Then a new sterile headcover is secured. The marmoset is  
36 removed from the chair afterward and is returned to its housing.

### 38 **Acoustic recordings**

39 A microphone (Sennheiser ME66) was positioned near the top of the animal at a  $60\text{cm}$  distance from  
40 the top of the partial restraint device. This microphone was connected to a ZOOM H4n Handy  
41 Recorder, which worked as a digital amplifier. Audio signals were acquired at a sampling frequency of  
42  $96$  kHz. fUSi signal and acoustic signals were synchronized using the TTL signal from the ultrasound  
43 machine, indicating image formation.

## 1 **Playback procedures**

2 A speaker (JBL LSR305 5") was located on the other side of the room at 4m from the animal. An  
3 opaque cloth occluder prevented the subjects from visualizing the speaker. We calibrated the sound  
4 level to be at 60dB at the animal head location. Ambient noise was below 30dB. The fUSi recording  
5 session always started with 10 minutes recording of baseline CBV activity without playback stimuli.  
6 For the acoustic stimuli we used 5 different call types (Phee, trillphee, trill, twitter, and alarm call) with  
7 one scrambled noise stimulus. These were presented using a block design with a playback block  
8 duration of 18s. The between block intervals ranged between 25 s to 50 s and the duration were  
9 randomly and uniformly chosen for each trial. Each block was composed of the same call type from  
10 the same subject. We recorded calls from nine marmosets with more than 20 calls for each type of  
11 call. Each subject only received playback calls of the animals other than self. We randomized the order  
12 of the type of call of the block and the calls chosen within each block. The total acoustic power within  
13 a block was normalized to be the same for every block. The interval between calls within the same  
14 block was one second.

15

## 16 **Vocalization data**

17 Marmoset vocalization and fUS signals were simultaneously recorded while an animal vocalized  
18 spontaneously (*i.e.*, no playback or self-produced vocalization within 12 s before the vocalization  
19 onset), as a response to playback stimuli (*i.e.*, playback offset was within 12 s to 0.5 s before the  
20 vocalization onset), and as a sequence to another call produced by the subject (*i.e.*, subject's previous  
21 call offset was within 12 s to 0.5 s before the next vocalization onset). We detected call using Audacity  
22 spectrogram view. The onset and offset of a call were defined as the first and last time points with the  
23 power at the fundamental frequency above the background noise. Automated detection programs had  
24 a considerable false-negative rate and were not reliable, especially for soft calls. Onset and offset of  
25 vocalization were defined as the first and last time points at which the spectrogram of the call was  
26 visible.

27

## 28 **Trials exclusion criteria**

29 To detect movement artifacts, we calculated the average fUS signal for each frame. The trial was  
30 excluded if the average fUS signal for a frame during a playback or vocalization trial was larger than 5  
31 standard deviations of the fUS activity during the session. If there was a vocal production during  
32 playback stimulus, the trial was also excluded. We did not use motion correction algorithms to avoid  
33 known spurious correlation issues (46).

34

## 35 **Number of playback trials (Figs. 1E-I and 2A-F)**

36 After trial exclusion criteria, we obtained a total of 438 (8,130,164,108, 28) phees, 449 (8, 132, 175,  
37 107, 27) trillphees, 428 (8, 134, 150, 108, 28) trills, 453 (8, 133, 177, 108, 27) twitters, 455 (8, 135, 181,  
38 105, 26) alarm calls, and 50 (0, 22, 2, 26, 0) noise stimuli. Each number in the parenthesis indicate the  
39 number of playback stimuli for each subject.

40

## 41 **Number of vocal production (Fig. 3B-J) and audio-vocal (Fig. 4A-B) trials**

42 Only three out of five subjects vocalized spontaneously during the experimental sessions. All three  
43 subjects produced phee, trill and alarm calls, but not all subjects produced trillphee and twitter.  
44 Therefore, we considered phee, trill and alarm calls for vocal production trials. The numbers of calls  
45 for each type of call and each subject (indicated in the parenthesis) were the following: spontaneous  
46 call phee 173 (23, 35, 115), trill 87 (62, 13, 12), alarm call 61 (23, 14, 24). Response call phee 214 (11,  
47 44, 159), trill 78 (47,1,30), alarm call 85 (25, 18, 42). Sequence call phee 483 (3, 21, 459), trill 81 (21,

1 0, 60), alarm call 169 (11, 55, 103). For audio-vocal interaction trials, we combined phee and trill as a  
2 single group of contact calls.

3

#### 4 **Registration of fUS images to a reference image for each subject**

5 We chose a reference session for each subject and calculated the mean intensity at the logarithmic  
6 scale, normalized, and converted it to an unsigned 8-bit image. The obtained image was used as the  
7 registration template for that subject. The non-brain region above the sagittal sinus was masked out  
8 to avoid false signals. We then used the averaged image of each session to align to the reference by  
9 Elastix (47) (parameter settings see files in ‘registrationParametersFUSi’). We then applied *transformix*  
10 to each frame in a session using the *elastix* transformation parameters calculated from the  
11 registration step.

12

#### 13 **Registration of fUS images of all subjects to a reference subject**

14 To have all the fUS results in a single reference image, we registered all subjects’ images to a single  
15 subject. We performed this step after the image registration within each subject. We use the same  
16 method as described in “Registration of fUS images to reference images for each subject.”

17

#### 18 **Registration of fUS reference to the brain atlas**

19 We carried out a 3-step registration to align the fUS results to a marmoset brain atlas. In the first  
20 step, we register the autofluorescent channel of the volumetric light-sheet images of cleared  
21 marmoset brains to an MRI atlas (48). In the second step, we aligned the midsagittal slice of the co-  
22 registered vessel signal channel to the fUS reference using the ImageJ plugin BUnwarpJ (cite  
23 “Consistent and Elastic Registration of Histological Sections using Vector-Spline Regularization”).  
24 The atlas segmentation of the midsagittal section was thus aligned with the fUS images from the  
25 same subject. Available MRI atlas does not have a full annotation of subcortical areas; therefore, we  
26 added a third step in which we aligned another marmoset brain atlas (49) to the reference brain to  
27 complete the annotation. Image registration was done using Elastix. All procedures described below  
28 were done using the registered fUS images.

29

#### 30 **Preprocessing of fUS signal**

31 For each frame, a spatial smoothing using Gaussian kernel with 5 voxel- width and 2 standard  
32 deviation was applied (fspecial in MATLAB). For each session, we performed a PCA using all  
33 voxels. The first component was related to activities in the large blood vessels; therefore, we  
34 excluded the first PCA and reconstructed the whole fUS signal.

#### 35 **Parcellation of the fUS signal**

36 To describe the brain's mesoscale activity, we clustered voxels with CBV dynamics that were similar  
37 to each other during playback and vocal production separately. To do so, we initially calculated the  
38 correlation matrix between each brain voxel. For playback trials, we correlated the CBV activities of  
39 each voxel for each stimuli starting from 10s before the stimuli onset up to 30s after the stimuli onset.  
40 For vocal production trials, we correlated the CBV activities of each voxel for each stimuli starting  
41 from 40s before the stimuli onset up to 40s after the stimuli onset. To obtain the distance matrix  
42 between voxels CBV activities, we calculated the FDR corrected p-value for the corresponding  
43 correlation. We then calculated the average distance matrix for each type of playback call for each  
44 subject. Finally, we averaged over all subjects and types of calls to obtain the overall distance matrix.  
45 With this procedure, we make the relevance of each condition and subject on the overall distance

1 matrix balanced. We then used the average distance matrix as input to a spectral clustering algorithm  
2 with 100 clusters. Clusters that showed edge artifacts were excluded. The resulting parcellations are  
3 shown in figs. S7A-B. The number of parcellation clusters was chosen to approximately match the  
4 number of areas annotated for the brain section.

### 5 6 **Calculating the parcellated and mean CBV activity**

7 For each subject and each trial, we calculated the average of CBV activities of the voxels in each  
8 parcellation cluster. To obtain the parcellated CBV activity we smoothed the averaged CBV activity  
9 using a cubic spline (csap in MATLAB). To calculate the mean CBV activity, we initially averaged the  
10 parcellated CBV activities for all trials of interest of each subject and then averaged the CBV activities  
11 of all subjects. In this way, we avoided that a single subject biased the mean CBV activity.

### 12 13 **Calculating the significance of the mean CBV (Figs. 1E-I and 3B-F)**

14 For the playback trials, we used the parcellated CBV activity between 10s to 0.5s before the stimuli  
15 onset as the baseline. For the vocal production trials, we used the parcellated CBV activity between  
16 30s to 20s before the block stimuli onset as the baseline. This time interval reduced the possibility that  
17 the baseline was influenced by CBV activity related to the initiation of vocalization. To calculate the  
18 significance of the mean CBV activity for each trial, parcellation cluster, and subject, we calculated the  
19 maximum CBV activity during baseline. We then constructed the symmetric 99.95% confidence  
20 interval for the maximum baseline values of all trials. We considered that the mean CBV activity for  
21 all call trials (phee, trillphee, trill, twitter, alarm call) during playback (0s to 18s after the stimuli onset)  
22 was significant if the value was above or below the 99.95% confidence interval (*i.e.*,  $p = 0.05$  after  
23 Bonferroni correction for the 100 parcellated brain areas). We used the Bonferroni correction to  
24 guarantee family wise-error rate, so that only the most significant areas were included although there  
25 is a risk of missing some weakly activated areas. For Figs. 1E and 3B, we plotted the activity of  
26 parcellation cluster which the overlap was largest with the corresponding annotated brain region.

### 27 28 **Calculating the significance of difference between mean CBV (Figs. 2A-E, 3H-I, and 4A-B)**

29 To measure the difference in the dynamics between mean CBV responses for different types of  
30 stimuli, we first calculated the mean CBV activity for each type of playback stimuli (for playback trials)  
31 and calls (for vocalization and audio-vocal trials). We then calculated the Euclidean distance between  
32 the mean CBV response for each call type for the interval 0 s to 30 s with respect to playback onset  
33 (for playback trials, Fig. 2), -12 s to 30 s with respect to call onset (for vocalization trials, Fig. 3), and  
34 0 s to 30s with respect to call onset (for audio-vocal trials, Fig. 4). Finally, we multiplied the Euclidean  
35 distance with the sign of the difference between mean CBV responses for each parcellation cluster.  
36 To calculate the significance of the signed Euclidean distance, we resampled the trials 2000 times and  
37 calculated the signed Euclidean distance with a randomized sign to construct the bootstrap statistical  
38 test. The randomization of the sign allowed us to construct the distribution for null hypothesis of  
39 mean signed Euclidean distance equal to zero. This procedure allowed us to preserve the spatial  
40 correlation between different CBV activities, which is ignored in a voxel-wise analysis. We adjusted  
41 the p-values using Benjamini-Hochberg FDR correction for the number of parcellation clusters. We  
42 used this FDR correction to guarantee high power for the statistical test.

### 43 44 **Hierarchical clustering between CBV activities (Figs. 2F and 3J)**

45 To measure the distance between the CBV responses of the entire medial brain region to different  
46 playback stimuli and vocalizations, we calculated the Euclidean distance between call types for each  
47 parcellation cluster as described above and averaged among all parcellation clusters. Hence, we  
48 generated a distance matrix between the CBV responses for different playback stimuli. We then

1 clustered the brain responses to different call types using the hierarchical clustering algorithm  
2 (dendrogram in MATLAB).

3

#### 4 **Acoustic analysis (fig. S3A-B)**

5 After detecting the onset and offset of the call syllable, a custom-made MATLAB routine calculated  
6 the duration, dominant frequency, amplitude modulation (AM) frequency, and Wiener entropy of each  
7 syllable (29). The duration of a syllable is the difference between the offset and onset of a call. To  
8 calculate the dominant frequency of a call, we first calculated the spectrogram and obtained the  
9 frequencies at which the spectrogram had maximum power for each time point. The dominant  
10 frequency of a syllable was calculated as the maximum of those frequencies. The spectrogram was  
11 calculated using an FFT window of 1024 points, Hanning window, with 50% overlap. The AM  
12 frequency was calculated in the following way. First, the signal was bandpass filtered between 6 to 10  
13 kHz and then a Hilbert transform was applied. The absolute value of the resulting signal gives us the  
14 amplitude envelope of the modulated signal. The 6-10 kHz frequency range was found to give accurate  
15 values for the syllable envelope. Finally, the AM frequency was calculated as the dominant frequency  
16 of the amplitude envelope. The Wiener entropy is the logarithm of the ratio between the geometric  
17 and arithmetic means of the power spectrum values across different frequencies. The Wiener entropy  
18 represents how broadband the power spectrum of a signal is. The closer the signal is to white noise,  
19 the higher the value of Wiener entropy will be. We reduced the dimensionality by applying PCA to  
20 duration, dominant frequency, AM frequency, and Wiener entropy for each call and projecting the  
21 values to the first two principal component axis. To calculate the hierarchical clustering, we calculated  
22 the mean duration, dominant frequency, amplitude modulation (AM) frequency, and Wiener entropy  
23 for each call type. Then we computed the correlation matrix between the call types. We used the  
24 correlation matrix as the distance matrix to cluster the call types.

25

26

#### 27 **Correlation matrix between SBN, ACC and motor cortical areas (Fig. 3G, figs. S2, and S5)**

28 To calculate the correlation between the CBV activities of anterior cingulate cortex (Brodmann area  
29 25), anterior hypothalamus, ventromedial hypothalamus, pre-optic area, extended amygdala, lateral  
30 septum, periaqueductal gray, limbic thalamus, M1, SMA, and pre-SMA, we first calculated the mean  
31 CBV activity for each area during spontaneous vocal production. The registered atlas delineated each  
32 area (ROI). Then we correlated the CBV dynamics (from the onset of call to 15s after the call onset)  
33 of each ROI to obtain the Pearson correlation matrix.

1

2 Supplementary figures

Figure S1

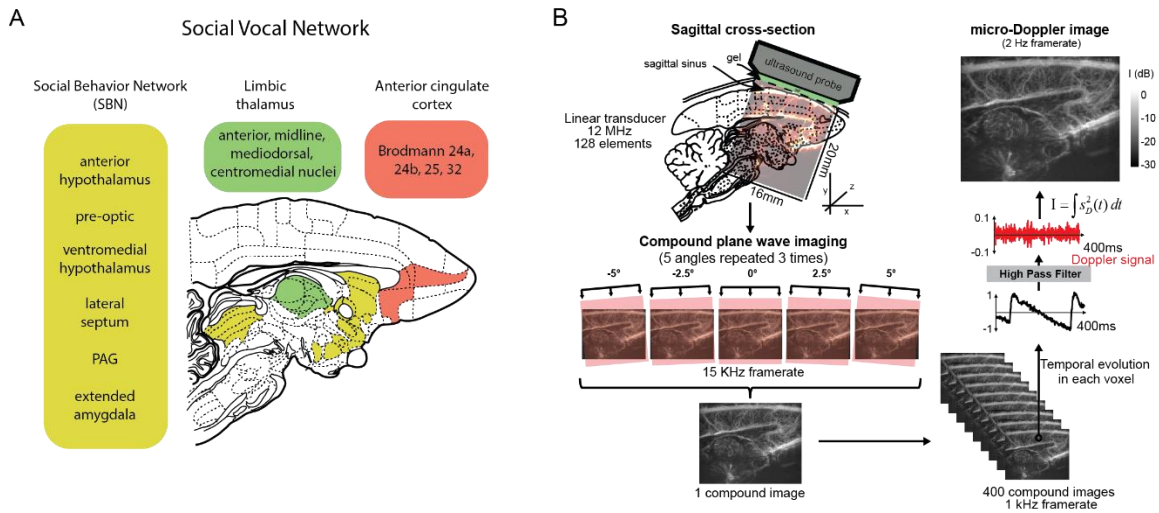

3

4 **fig. S1: Medial brain region related to social communication.** (A) Anatomical identification of a social  
 5 vocal network formed by the social behavior network (SBN), anterior cingulate cortex (ACC) and limbic  
 6 thalamus (anteromedial, midline, and mediodorsal thalamus). (B) Functional ultrasound imaging (fUS)  
 7 processing of medial brain regions from the ultrasound beam forming to image formation. For details, see  
 8 (50).

## Figure S2

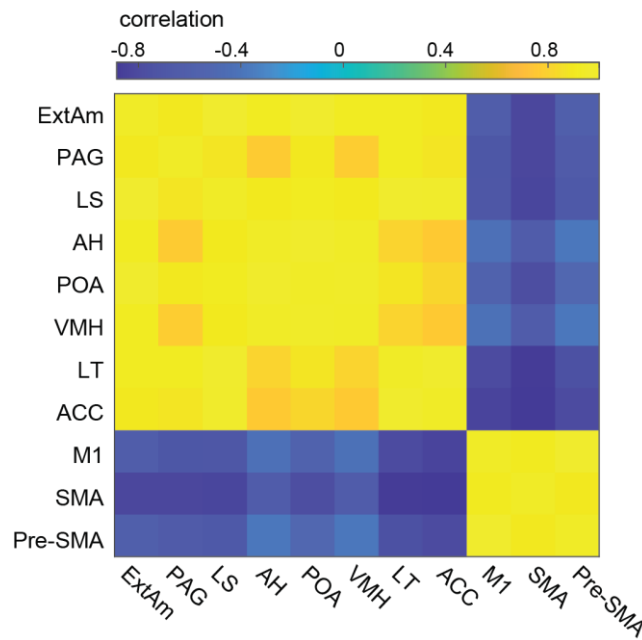

1  
2

3 **fig. S2: Correlation matrix of the CBV activity in vocal perception.** Correlation values between the mean  
4 CBV activity (for all stimuli) for each brain area is represented by different colors for the corresponding  
5 column and line. All correlations were statistically significant ( $p < 0.05$ ).

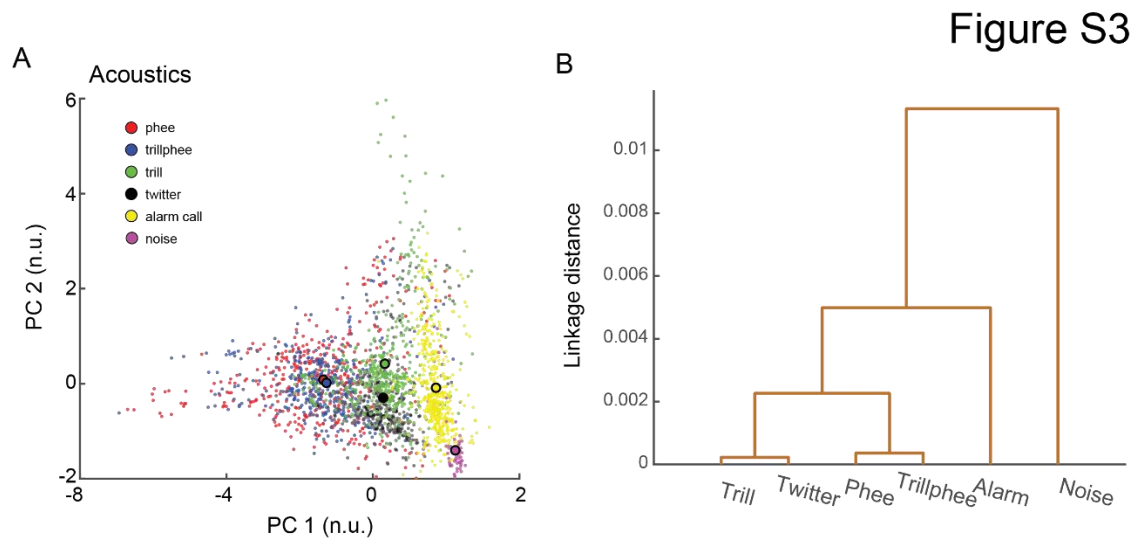

1

2 **fig. S3: Acoustic characteristics of the playback stimuli and brain response. (A)** Scatter plot showing  
3 the distribution of first two PCA for all playback calls recorded during experiments. PCA of duration,  
4 amplitude modulation, dominant frequency, and entropy. **(B)** Hierarchical clustering of the mean acoustic  
5 characteristics for each call type.



## Figure S4

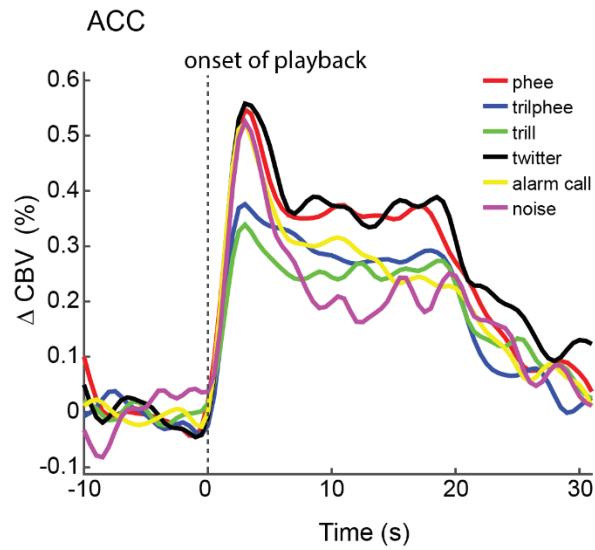

1  
2 **fig. S4: Average CBV response in ACC for each type of call.** Observe the difference in the trajectories of  
3 the CBV response for different call types.

1

Figure S5

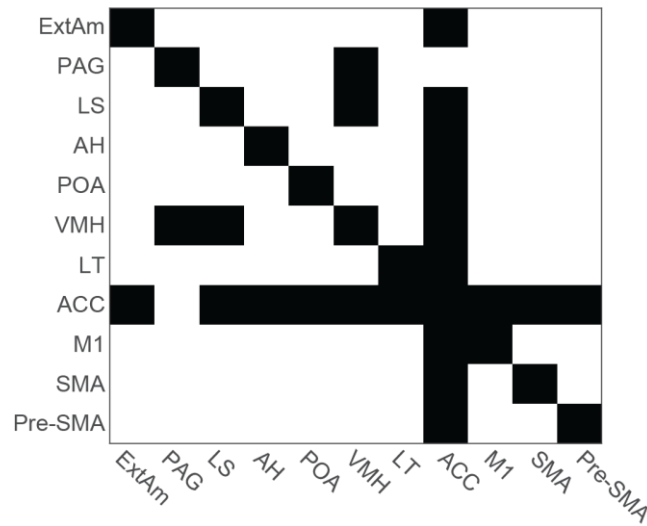

2

3

4

5

**fig. S5: Matrix showing the significant correlations of the CBV activity in vocal production.**

6

Significant ( $p < 0.05$ ) and non-significant correlation values are shown in white and black, respectively. The

7

corresponding correlation values are shown in Fig. 3G.

1

Figure S6

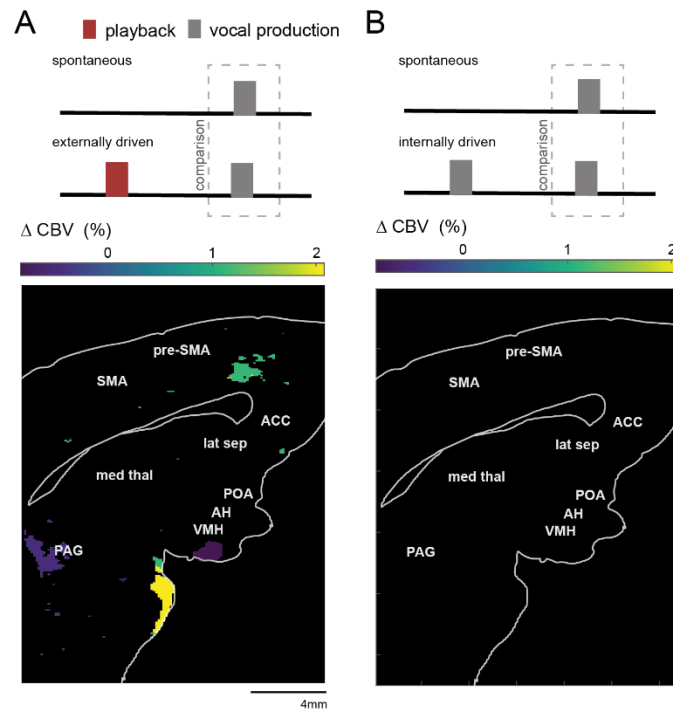

2

3 **fig. S6: History dependence in the medial brain regions during audio-vocal interaction in alarm calls.**  
4 **(A)** CBV activity difference between spontaneous and response alarm calls. The brain map shows areas that  
5 were significantly different in both conditions ( $p < 0.05$  FDR corrected). Colorbar shows the percentage  
6 difference between the CBV activity during production of (externally driven) response and spontaneous alarm  
7 calls. Positive values indicate that the activity was stronger for the response to playback calls. **(B)** CBV  
8 activity difference between spontaneous and sequence alarm calls. Observe that there was no area with a  
9 significant difference.

Figure S7

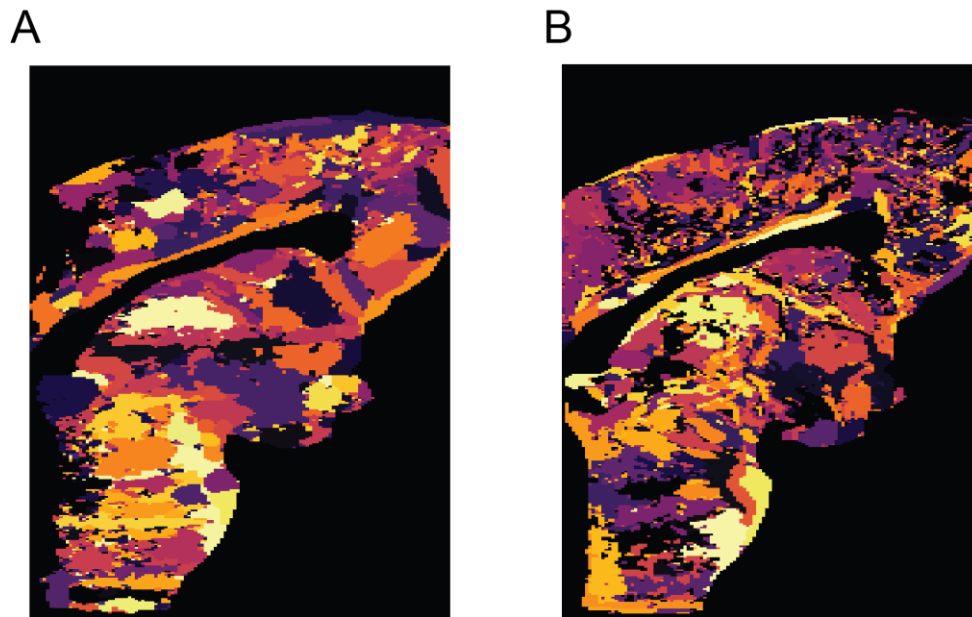

1  
2  
3  
4  
5

**fig. S7: Parcellation of medial brain regions. (A)** Parcellation result for vocal perception. **(B)** Parcellation result for vocal production.
